# Supplementary material
Source: HighWire-hosted journal article supplement (https://thorax.bmj.com/content/75/10/891)
Supplement: inline-supplementary-material-1 [file inline-supplementary-material-1.pdf]

## **Pediatric Reproducibility Limits for the Forced Expiratory Volume in 1 second**

**Sanja Stanojevic<sup>1,2</sup>, Nicole Filipow<sup>1</sup>, Felix Ratjen<sup>1,3</sup>**

<sup>1</sup>Translational Medicine, SickKids Research Institute, Toronto, Canada

<sup>2</sup>Institute of Health Policy, Management and Evaluation, University of Toronto, Toronto, Canada

<sup>3</sup>Division of Respiratory Medicine, Department of Paediatrics, Hospital for Sick Children, Canada

Corresponding Author: Sanja Stanojevic PhD  
Translational Medicine  
SickKids Research Institute  
555 University Avenue  
Hospital for Sick Children  
Toronto, Ontario, Canada M5G 1X8  
[Sanja.Stanojevic@sickkids.ca](mailto:Sanja.Stanojevic@sickkids.ca)

**Keywords:** spirometry, reproducibility, cystic fibrosis

**Subject Category:** Pediatrics

**Running title:** FEV<sub>1</sub> reproducibility in children

**Funding:** This study was funded by a Cystic Fibrosis Research Innovation Award from Vertex Pharmaceuticals

## **Supplemental Material**

Table S1. Summary of Sensitivity Analyses

| Data          | Subset                                | Equation                                                                          |
|---------------|---------------------------------------|-----------------------------------------------------------------------------------|
| All           | All                                   | 0.64 (95%CI 0.62;0.66) – 0.04time (95%CI -0.04;-0.03) + 0.02age (95%CI 0.02;0.02) |
| All           | Integer Times                         | 0.82 (95%CI 0.80;0.85) – 0.04time (95%CI -0.05;-0.03) + 0.02age (95%CI 0.02;0.02) |
| All           | Exclude 1 <sup>st</sup> Test Occasion | 0.67 (95%CI 0.65;0.69) – 0.03time (95%CI -0.04;-0.03) + 0.01age (95%CI 0.01;0.01) |
| 5 Years       | All                                   | 0.61 (95%CI 0.58;0.63) – 0.03time (95%CI -0.04;-0.02) + 0.02age (95%CI 0.02;0.02) |
| 5 Years       | Integer Times                         | 0.83 (95%CI 0.80;0.87) – 0.04time (95%CI -0.06;-0.03) + 0.02age (95%CI 0.01;0.03) |
| 5 Years       | Exclude 1 <sup>st</sup> Test Occasion | 0.64 (95%CI 0.62;0.67) – 0.03time (95%CI -0.04;-0.02) + 0.02age (95%CI 0.02;0.02) |
| CF population | All                                   | 0.74 (95%CI 0.70;0.77) – 0.03time (95%CI -0.03;-0.02) + 0.01age (95%CI 0.01;0.01) |

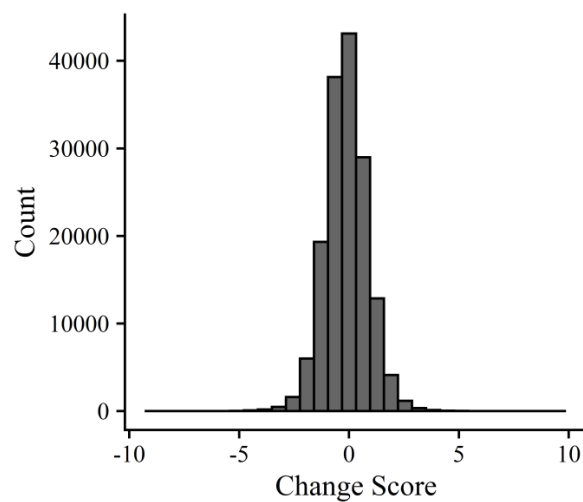

**Figure S1.** Distribution of change scores in healthy individuals.

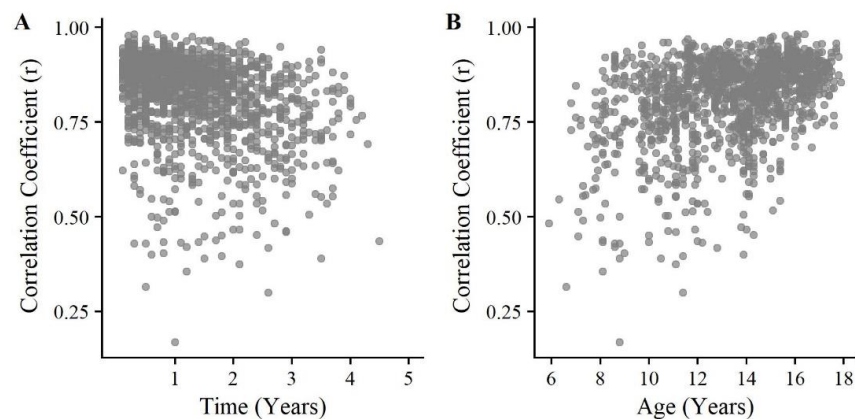

**Figure S2.** Correlations of repeated zFEV<sub>1</sub> measurements against a) time between measurements and b) age at the first measurement for 1337 pairs of correlations in subjects with CF.
